# Supplementary material
Source: PubMed Central journal article supplement (PMC3535273)
Supplement: NIHMS407495-supplement-1_si_001.pdf [file NIHMS407495-supplement-1_si_001.pdf]

**Supporting Information for “Rapid Protein Global Fold Determination Using Ultrasparse Sampling, High-Dynamic Range Artifact Suppression, and Time-Shared NOESY” by Brian E. Coggins, Jonathan W. Werner-Allen, Anthony Yan, and Pei Zhou**

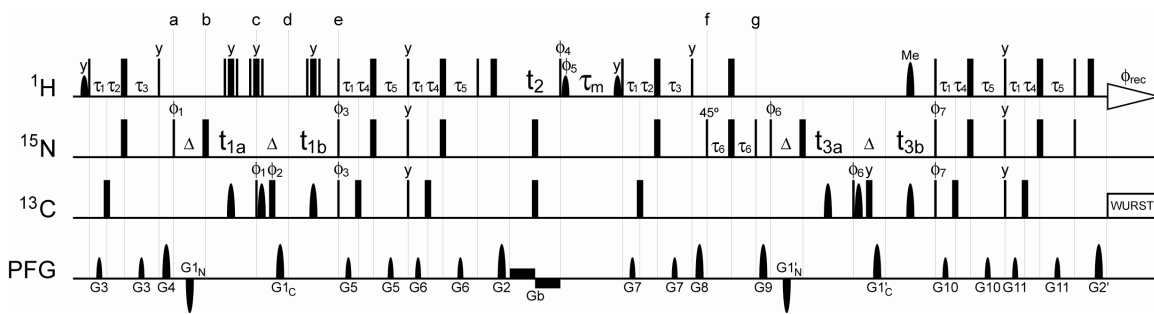

**Figure S1.** Pulse sequence for the 4-D TS NOESY experiment. Narrow and wide bars represent  $90^\circ$  and  $180^\circ$  pulses, respectively. All pulses are applied along the x-axis unless noted otherwise.  $90^\circ$  selective water pulses are indicated by short, shaped bars. All shaped carbon pulses are  $281 \mu\text{s}$  off-resonance Isnob2 pulses<sup>1</sup> (centered at  $175 \text{ ppm}$  with a bandwidth of  $30 \text{ ppm}$ ) that refocus carbonyl coupling during nitrogen chemical shift evolution. The delays are  $\tau_1 = 1.7 \text{ ms} \approx 1/4J_{\text{CH}}$ ,  $\tau_2 = 0.7 \text{ ms} \approx 1/4J_{\text{NH}} - 1/4J_{\text{CH}}$ ,  $\tau_3 = 2.4 \text{ ms} \approx 1/4J_{\text{NH}}$ ,  $\tau_4 = 1.05 \text{ ms} \approx 1/4J_{\text{NH}} - 1/4J_{\text{CH}}$ ,  $\tau_5 = 2.75 \text{ ms} \approx 1/4J_{\text{NH}}$ ,  $\tau_6 = 1.34 \text{ ms} \approx 1/8J_{\text{NH}}$ ,  $\tau_m = 200 \text{ ms}$ , and  $\Delta = 200 \mu\text{s}$ . Time increments are set to  $\Delta t_{1a} = 1/\text{sw}_N - 1/\text{sw}_C$ ,  $\Delta t_{1b} = 1/\text{sw}_C$ ,  $\Delta t_2 = 1/\text{sw}_H$ ,  $\Delta t_{3a} = 1/\text{sw}_N - 1/\text{sw}_C$ , and  $\Delta t_{3b} = 1/\text{sw}_C$ . The proton inversion pulse at point c is required to refocus  $J_{\text{NH}}$  scalar coupling in the two  $\Delta$  delays (points a-b and c-d), while proton decoupling during  $t_{1a}$  (points b-c) and  $t_{1b}$  (points d-e) evolution is achieved by the proton inversion pulses centered in these periods. The shaped bar marked ‘Me’ represents a  $587 \mu\text{s}$  off-resonance G3 inversion pulse<sup>2</sup> (centered at  $-2.0 \text{ ppm}$  with a bandwidth of  $8.0 \text{ ppm}$ ) that selectively refocuses methyl proton coherence during  $t_{3b}$  without affecting water and amide signals. The  $^{15}\text{N}$  carrier frequency is shifted  $45 \text{ Hz}$  downfield during the NOE mixing period to re-center nitrogen signals on the TROSY component. The spin-state-selective element between points f and g is used for active suppression of the  $^1\text{H}$ - $^{15}\text{N}$  anti-TROSY component.<sup>3</sup> Carbon decoupling during acquisition is achieved by using a WURST-40 sequence<sup>4</sup> with a field strength of  $8.0 \text{ kHz}$ . Phase cycling is  $\phi_1 = [2x, 2(-x)]$ ,  $\phi_2 = [x]$ ,  $\phi_3 = [x]$ ,  $\phi_4 = [-x]$ ,  $\phi_5 = [x]$ ,  $\phi_6 = [x, -x]$ ,  $\phi_7 = [x]$ ,  $\phi_{\text{rec}} = [x, -x, -x, x]$ . Inversion of  $\phi_4$  (and  $\phi_5$  for water suppression) at even numbered lattice points in  $t_2$  introduces a frequency shift of  $\text{sw}_2/2$  to the H1 dimension in order to center the amide signals while leaving the transmitter frequency on water. Axial peaks are removed by setting  $(\phi_1 + 180^\circ, \phi_{\text{rec}} + 180^\circ)$  and  $(\phi_6 + 180^\circ, \phi_{\text{rec}} + 180^\circ)$  at even numbered lattice points in F1 and F3, respectively. Hypercomplex data collection for the two time-shared, sensitivity-enhanced coherence transfers requires inversion of  $\phi_3$ ,  $\phi_{\text{rec}}$ , and G2 for the F1 dimension and inversion of  $\phi_7$  and G2’ for the F3 dimension. Cosine-sine selection for the F1/ F2 dimensions is controlled by incrementing phase  $\phi_4$  (and phase  $\phi_5$

for water suppression). For the gradient selection of nitrogen and carbon coherence pathways, nitrogen single quantum coherence is encoded with the sum of  $G_{1N}$  and  $G_{1C}$  (or  $G'_{1N}$  and  $G'_{1C}$  in the second transfer) whereas carbon single quantum coherence is encoded only by  $G_{1C}$ . Therefore, the duration of these gradients and the decoding gradient  $G_2$  are set such that  $\tau_{G_{1C}} = 4\tau_{G_2}$  and  $\tau_{G_{1C}} + \tau_{G_{1N}} = 10\tau_{G_2}$ , while the field strengths are optimized empirically, with the  $G_{1C}$  gradient calibrated first. Gradient durations and field strengths are  $G_{1N} = (1.2 \text{ ms}, -18.34 \text{ G/cm})$ ,  $G_{1C} = (0.8 \text{ ms}, 18.51 \text{ G/cm})$ ,  $G_2 = (0.2 \text{ ms}, 18.38 \text{ G/cm})$ ,  $G'_{1N} = (1.2 \text{ ms}, -20.38 \text{ G/cm})$ ,  $G'_{1C} = (0.8 \text{ ms}, 20.56 \text{ G/cm})$ ,  $G_2' = (0.2 \text{ ms}, 20.42 \text{ G/cm})$ ,  $G_3 = (0.5 \text{ ms}, 11.64 \text{ G/cm})$ ,  $G_4 = (1 \text{ ms}, -18.99 \text{ G/cm})$ ,  $G_5 = (0.5 \text{ ms}, 17.77 \text{ G/cm})$ ,  $G_6 = (0.5 \text{ ms}, 15.72 \text{ G/cm})$ ,  $G_7 = (0.5 \text{ ms}, 10.01 \text{ G/cm})$ ,  $G_8 = (0.7 \text{ ms}, 19.81 \text{ G/cm})$ ,  $G_9 = (1 \text{ ms}, -18.99 \text{ G/cm})$ ,  $G_{10} = (0.5 \text{ ms}, 10.41 \text{ G/cm})$ , and  $G_{11} = (0.5 \text{ ms}, 14.09 \text{ G/cm})$ . A small refocusing gradient is applied during  $t_2$  ( $G_b$ ) to suppress water radiation damping. In order to separate NOESY pathways originating from methyl and amide protons during data processing, two sets of FIDs are collected for each set of ( $t_{1a} + t_{1b}$ ,  $t_2$ ,  $t_{3a} + t_{3b}$ ) delays, with  $\phi_2 = [y]$  in the second set of FIDs to selectively invert methyl signals during the first coherence transfer.<sup>5</sup>

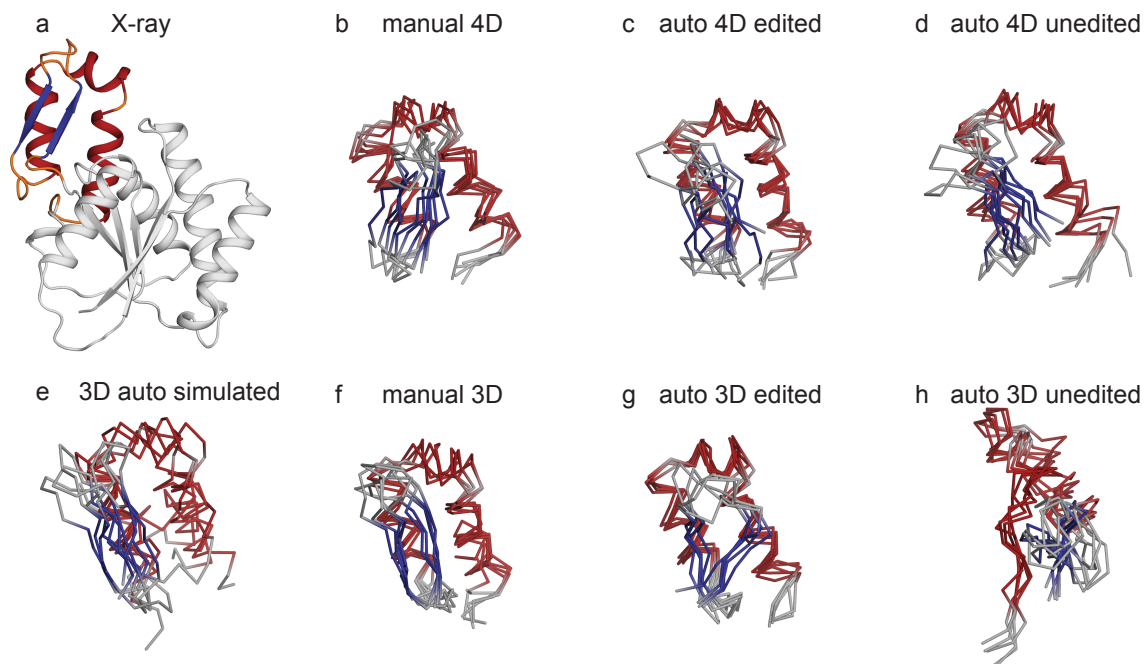

**Figure S2.** Alignment of the substrate-binding subdomain of Ssu72, which is not constrained to the main phosphatase domain by the TS NOESY data, in ensembles from CYANA structure calculations. The inputs were manually-assigned and manually-edited peaks (b, f), auto-assigned and manually-edited peaks (c, g), and auto-assigned and unedited peaks (d, h). In (b-d), peak lists are from SCRUB-processed 4-D TS spectra. In (f-h), peak lists are from conventional 3-D TS spectra. In (e), calculations are based on simulated 3-D peak lists derived from 4-D spectra. The reference crystal structure (PDB code 3FDF) is shown in (a).

|                                                       |                                          | manual<br>edited 4-D | auto<br>edited 4-D | auto<br>unedited 4-D | auto<br>simulated 3-D |
|-------------------------------------------------------|------------------------------------------|----------------------|--------------------|----------------------|-----------------------|
| <b>Peak Assignment Statistics <sup>a</sup></b>        |                                          |                      |                    |                      |                       |
| all spectra                                           | <i>correct – all <sup>b</sup></i>        | 1818                 | 1778 (233)         | n/a                  | 1529 (674)            |
|                                                       | <i>correct – long-range <sup>b</sup></i> | 698                  | 678 (126)          |                      | 485 (277)             |
|                                                       | <i>unassigned</i>                        | 0                    | 32                 |                      | 60                    |
|                                                       | <i>inconsistent <sup>c</sup></i>         | 0                    | 8                  |                      | 229 (102)             |
| amide-amide                                           | <i>correct – all <sup>b</sup></i>        | 879                  | 853 (16)           | n/a                  | 738 (222)             |
|                                                       | <i>correct – long-range <sup>b</sup></i> | 271                  | 261 (8)            |                      | 175 (64)              |
|                                                       | <i>unassigned</i>                        | 0                    | 25                 |                      | 39                    |
|                                                       | <i>inconsistent <sup>c</sup></i>         | 0                    | 1                  |                      | 102 (51)              |
| methyl-methyl                                         | <i>correct – all <sup>b</sup></i>        | 346                  | 341 (142)          | n/a                  | 252 (170)             |
|                                                       | <i>correct – long-range <sup>b</sup></i> | 228                  | 224 (97)           |                      | 156 (116)             |
|                                                       | <i>unassigned</i>                        | 0                    | 0                  |                      | 2                     |
|                                                       | <i>inconsistent <sup>c</sup></i>         | 0                    | 5                  |                      | 92 (51)               |
| amide-methyl                                          | <i>correct – all <sup>b</sup></i>        | 330                  | 323 (30)           | n/a                  | 300 (135)             |
|                                                       | <i>correct – long-range <sup>b</sup></i> | 114                  | 110 (11)           |                      | 90 (52)               |
|                                                       | <i>unassigned</i>                        | 0                    | 5                  |                      | 9                     |
|                                                       | <i>inconsistent <sup>c</sup></i>         | 0                    | 2                  |                      | 21                    |
| methyl-amide                                          | <i>correct – all <sup>b</sup></i>        | 263                  | 261 (45)           | n/a                  | 239 (147)             |
|                                                       | <i>correct – long-range <sup>b</sup></i> | 85                   | 83 (10)            |                      | 64 (45)               |
|                                                       | <i>unassigned</i>                        | 0                    | 2                  |                      | 10                    |
|                                                       | <i>inconsistent <sup>c</sup></i>         | 0                    | 0                  |                      | 14                    |
| <b>Ensemble Convergence and Accuracy <sup>d</sup></b> |                                          |                      |                    |                      |                       |
| Mean RMSD <sub>bb,core</sub> (Å)                      |                                          | 0.904 ± 0.084        | 0.958 ± 0.081      | 1.193 ± 0.118        | 3.128 ± 1.272         |
| Mean RMSD <sub>bb,full</sub> (Å)                      |                                          | 1.340 ± 0.109        | 1.774 ± 0.272      | 2.500 ± 0.525        | 9.579 ± 2.648         |
| Mean bias <sub>bb,core</sub> (Å)                      |                                          | 1.634 ± 0.075        | 1.836 ± 0.300      | 2.665 ± 0.611        | 8.731 ± 3.430         |
| Mean bias <sub>bb,full</sub> (Å)                      |                                          | 2.455 ± 0.084        | 3.331 ± 0.185      | 5.039 ± 1.374        | 16.689 ± 2.177        |

<sup>a</sup> Assignment statistics are presented for a single CYANA structure calculation that produced an ensemble with the median RMSD<sub>bb,core</sub> out of five independent calculations. The unedited peak lists were not assigned manually, and therefore the accuracy of auto-assignment by CYANA cannot be assessed.

<sup>b</sup> Numbers in parentheses indicate peaks with ambiguous assignments.

<sup>c</sup> 'Inconsistent' denotes peaks with automated assignments that differ from the manual ones; however, for the 4-D peak lists, the automated assignment is also compatible with the reference crystal structure in all cases.

<sup>d</sup> Mean RMSD and bias were calculated with five ensembles – produced by independent CYANA runs and containing five structures each – over all non-hydrogen backbone atoms (bb) in the converged portion of either the full protein (full, residues 22-260) or residues in secondary structure elements (core). Bias represents the average pairwise RMSD to the reference crystal structure (PDB code 2ILI).

**Table S1.** Peak assignment and structure determination statistics for CYANA global fold calculations of HCA2 with peak lists from 4-D time-shared spectra.

|                                                       |                                          | manual<br>edited 3-D | auto<br>edited 3-D | auto<br>unedited 3-D |
|-------------------------------------------------------|------------------------------------------|----------------------|--------------------|----------------------|
| <b>Peak Assignment Statistics <sup>a</sup></b>        |                                          |                      |                    |                      |
| all spectra                                           | <i>correct – all <sup>b</sup></i>        | 2121                 | 1659 (322)         | n/a                  |
|                                                       | <i>correct – long-range <sup>b</sup></i> | 893                  | 624 (149)          |                      |
|                                                       | <i>unassigned</i>                        |                      | 348                |                      |
|                                                       | <i>inconsistent <sup>c</sup></i>         |                      | 114                |                      |
| amide-amide                                           | <i>correct – all <sup>b</sup></i>        | 898                  | 689 (54)           | n/a                  |
|                                                       | <i>correct – long-range <sup>b</sup></i> | 288                  | 193 (18)           |                      |
|                                                       | <i>unassigned</i>                        |                      | 196                |                      |
|                                                       | <i>inconsistent <sup>c</sup></i>         |                      | 13                 |                      |
| methyl-methyl                                         | <i>correct – all <sup>b</sup></i>        | 271                  | 230 (109)          | n/a                  |
|                                                       | <i>correct – long-range <sup>b</sup></i> | 181                  | 147 (78)           |                      |
|                                                       | <i>unassigned</i>                        |                      | 21                 |                      |
|                                                       | <i>inconsistent <sup>c</sup></i>         |                      | 20                 |                      |
| amide-methyl                                          | <i>correct – all <sup>b</sup></i>        | 394                  | 307 (69)           | n/a                  |
|                                                       | <i>correct – long-range <sup>b</sup></i> | 154                  | 100 (20)           |                      |
|                                                       | <i>unassigned</i>                        |                      | 60                 |                      |
|                                                       | <i>inconsistent <sup>c</sup></i>         |                      | 27                 |                      |
| methyl-amide                                          | <i>correct – all <sup>b</sup></i>        | 558                  | 433 (90)           | n/a                  |
|                                                       | <i>correct – long-range <sup>b</sup></i> | 270                  | 184 (33)           |                      |
|                                                       | <i>unassigned</i>                        |                      | 71                 |                      |
|                                                       | <i>inconsistent <sup>c</sup></i>         |                      | 54                 |                      |
| <b>Ensemble Convergence and Accuracy <sup>d</sup></b> |                                          |                      |                    |                      |
| Mean RMSD <sub>bb,core</sub> (Å)                      |                                          | 0.895 ± 0.049        | 1.024 ± 0.116      | 1.429 ± 0.184        |
| Mean RMSD <sub>bb,full</sub> (Å)                      |                                          | 1.429 ± 0.120        | 2.310 ± 1.139      | 1.794 ± 0.113        |
| Mean bias <sub>bb,core</sub> (Å)                      |                                          | 1.752 ± 0.054        | 2.514 ± 0.239      | 13.222 ± 0.508       |
| Mean bias <sub>bb,full</sub> (Å)                      |                                          | 2.745 ± 0.096        | 6.040 ± 3.090      | 16.914 ± 1.169       |

<sup>a</sup> Assignment statistics are presented for a single CYANA structure calculation that produced an ensemble with the median RMSD<sub>bb,core</sub> out of five independent calculations. The unedited peak lists were not assigned manually, and therefore the accuracy of auto-assignment by CYANA cannot be assessed.

<sup>b</sup> Numbers in parentheses indicate peaks with ambiguous assignments.

<sup>c</sup> 'Inconsistent' denotes peaks with automated assignments that differ from the manual ones.

<sup>d</sup> Mean RMSD and bias were calculated with five ensembles – produced by independent CYANA runs and containing five structures each – over all non-hydrogen backbone atoms (bb) in the converged portion of either the full protein (full, residues 22-260) or residues in secondary structure elements (core). Bias represents the average pairwise RMSD to the reference crystal structure (PDB code 2ILI).

**Table S2.** Peak assignment and structure determination statistics for CYANA global fold calculations of HCA2 with peak lists from 3-D time-shared spectra.

|                                                       |                                          | manual<br>edited 4-D | auto<br>edited 4-D | auto<br>unedited 4-D | auto<br>simulated 3-D |
|-------------------------------------------------------|------------------------------------------|----------------------|--------------------|----------------------|-----------------------|
| <b>Peak Assignment Statistics <sup>a</sup></b>        |                                          |                      |                    |                      |                       |
| all spectra                                           | <i>correct – all <sup>b</sup></i>        | 1563                 | 1517 (174)         | n/a                  | 1280 (621)            |
|                                                       | <i>correct – long-range <sup>b</sup></i> | 490                  | 461 (89)           |                      | 296 (185)             |
|                                                       | <i>unassigned</i>                        | 0                    | 28                 |                      | 27                    |
|                                                       | <i>inconsistent <sup>c</sup></i>         | 0                    | 18                 |                      | 256 (129)             |
| amide-amide                                           | <i>correct – all <sup>b</sup></i>        | 703                  | 692 (19)           | n/a                  | 618 (216)             |
|                                                       | <i>correct – long-range <sup>b</sup></i> | 91                   | 84 (0)             |                      | 55 (21)               |
|                                                       | <i>unassigned</i>                        | 0                    | 10                 |                      | 16                    |
|                                                       | <i>inconsistent <sup>c</sup></i>         | 0                    | 1                  |                      | 69 (50)               |
| methyl-methyl                                         | <i>correct – all <sup>b</sup></i>        | 307                  | 300 (75)           | n/a                  | 181 (128)             |
|                                                       | <i>correct – long-range <sup>b</sup></i> | 201                  | 195 (55)           |                      | 110 (85)              |
|                                                       | <i>unassigned</i>                        | 0                    | 1                  |                      | 2                     |
|                                                       | <i>inconsistent <sup>c</sup></i>         | 0                    | 6                  |                      | 124 (79)              |
| amide-methyl                                          | <i>correct – all <sup>b</sup></i>        | 321                  | 302 (21)           | n/a                  | 275 (131)             |
|                                                       | <i>correct – long-range <sup>b</sup></i> | 123                  | 114 (9)            |                      | 81 (43)               |
|                                                       | <i>unassigned</i>                        | 0                    | 16                 |                      | 9                     |
|                                                       | <i>inconsistent <sup>c</sup></i>         | 0                    | 3                  |                      | 37                    |
| methyl-amide                                          | <i>correct – all <sup>b</sup></i>        | 232                  | 223 (59)           | n/a                  | 206 (146)             |
|                                                       | <i>correct – long-range <sup>b</sup></i> | 75                   | 68 (25)            |                      | 50 (36)               |
|                                                       | <i>unassigned</i>                        | 0                    | 1                  |                      | 0                     |
|                                                       | <i>inconsistent <sup>c</sup></i>         | 0                    | 8                  |                      | 26                    |
| <b>Ensemble Convergence and Accuracy <sup>d</sup></b> |                                          |                      |                    |                      |                       |
| Mean RMSD <sub>bb,core</sub> (Å)                      |                                          | 0.923 ± 0.128        | 1.009 ± 0.158      | 0.996 ± 0.098        | 8.784 ± 1.305         |
| Mean RMSD <sub>bb,full</sub> (Å)                      |                                          | 1.291 ± 0.095        | 1.296 ± 0.114      | 1.191 ± 0.068        | 9.242 ± 1.514         |
| Mean bias <sub>bb,core</sub> (Å)                      |                                          | 2.076 ± 0.126        | 2.926 ± 0.262      | 3.576 ± 0.226        | 25.461 ± 4.462        |
| Mean bias <sub>Sbb,full</sub> (Å)                     |                                          | 2.413 ± 0.133        | 3.107 ± 0.198      | 4.176 ± 0.274        | 25.252 ± 4.148        |

<sup>a</sup> Assignment statistics are presented for a single CYANA structure calculation that produced an ensemble with the median RMSD<sub>bb,core</sub> out of five independent calculations. The unedited peak lists were not assigned manually, and therefore the accuracy of auto-assignment by CYANA cannot be assessed.

<sup>b</sup> Numbers in parentheses indicate peaks with ambiguous assignments.

<sup>c</sup> 'Inconsistent' denotes peaks with automated assignments that differ from the manual ones; however, for the 4-D peak lists, the automated assignment is also compatible with the reference crystal structure in all cases.

<sup>d</sup> Mean RMSD and bias were calculated with five ensembles – produced by independent CYANA runs and containing five structures each – over all non-hydrogen backbone atoms (bb) in the converged portion of either the full protein (full, residues 5-37, 97-195) or residues in secondary structure elements (core). Bias represents the average pairwise RMSD to the reference crystal structure (PDB code 3FDF).

**Table S3.** Peak assignment and structure determination statistics for CYANA global fold calculations of Ssu72 with peak lists from 4-D time-shared spectra.

|                                                       |                                          | manual<br>edited 3-D | auto<br>edited 3-D | auto<br>unedited 3-D |
|-------------------------------------------------------|------------------------------------------|----------------------|--------------------|----------------------|
| <b>Peak Assignment Statistics <sup>a</sup></b>        |                                          |                      |                    |                      |
| all spectra                                           | <i>correct – all <sup>b</sup></i>        | 1923                 | 1537 (245)         | n/a                  |
|                                                       | <i>correct – long-range <sup>b</sup></i> | 724                  | 526 (127)          |                      |
|                                                       | <i>unassigned</i>                        |                      | 267                |                      |
|                                                       | <i>inconsistent <sup>c</sup></i>         |                      | 119                |                      |
| amide-amide                                           | <i>correct – all <sup>b</sup></i>        | 825                  | 682 (34)           | n/a                  |
|                                                       | <i>correct – long-range <sup>b</sup></i> | 171                  | 121 (7)            |                      |
|                                                       | <i>unassigned</i>                        |                      | 127                |                      |
|                                                       | <i>inconsistent <sup>c</sup></i>         |                      | 16                 |                      |
| methyl-methyl                                         | <i>correct – all <sup>b</sup></i>        | 193                  | 158 (62)           | n/a                  |
|                                                       | <i>correct – long-range <sup>b</sup></i> | 120                  | 102 (46)           |                      |
|                                                       | <i>unassigned</i>                        |                      | 17                 |                      |
|                                                       | <i>inconsistent <sup>c</sup></i>         |                      | 18                 |                      |
| amide-methyl                                          | <i>correct – all <sup>b</sup></i>        | 440                  | 345 (78)           | n/a                  |
|                                                       | <i>correct – long-range <sup>b</sup></i> | 202                  | 145 (40)           |                      |
|                                                       | <i>unassigned</i>                        |                      | 56                 |                      |
|                                                       | <i>inconsistent <sup>c</sup></i>         |                      | 39                 |                      |
| methyl-amide                                          | <i>correct – all <sup>b</sup></i>        | 465                  | 352 (71)           | n/a                  |
|                                                       | <i>correct – long-range <sup>b</sup></i> | 231                  | 158 (34)           |                      |
|                                                       | <i>unassigned</i>                        |                      | 67                 |                      |
|                                                       | <i>inconsistent <sup>c</sup></i>         |                      | 46                 |                      |
| <b>Ensemble Convergence and Accuracy <sup>d</sup></b> |                                          |                      |                    |                      |
| Mean RMSD <sub>bb,core</sub> (Å)                      |                                          | 0.668 ± 0.054        | 1.090 ± 0.117      | 1.307 ± 0.174        |
| Mean RMSD <sub>bb,full</sub> (Å)                      |                                          | 0.925 ± 0.079        | 1.372 ± 0.191      | 1.428 ± 0.176        |
| Mean bias <sub>bb,core</sub> (Å)                      |                                          | 1.856 ± 0.071        | 4.361 ± 1.847      | 12.300 ± 0.517       |
| Mean bias <sub>bb,full</sub> (Å)                      |                                          | 2.160 ± 0.079        | 5.214 ± 2.055      | 13.691 ± 0.553       |

<sup>a</sup> Assignment statistics are presented for a single CYANA structure calculation that produced an ensemble with the median RMSD<sub>bb,core</sub> out of five independent calculations. The unedited peak lists were not assigned manually, and therefore the accuracy of auto-assignment by CYANA cannot be assessed.

<sup>b</sup> Numbers in parentheses indicate peaks with ambiguous assignments.

<sup>c</sup> 'Inconsistent' denotes peaks with automated assignments that differ from the manual ones.

<sup>d</sup> Mean RMSD and bias were calculated with five ensembles – produced by independent CYANA runs and containing five structures each – over all non-hydrogen backbone atoms (bb) in the converged portion of either the full protein (full, residues 5-37, 97-195) or residues in secondary structure elements (core). Bias represents the average pairwise RMSD to the reference crystal structure (PDB code 3FDF).

**Table S4.** Peak assignment and structure determination statistics for CYANA global fold calculations of Ssu72 with peak lists from 3-D time-shared spectra.

## References

- (1) Kupce, E.; Boyd, J.; Campbell, I. D. *J Magn Reson Ser B* **1995**, *106*, 300.
- (2) Emsley, L.; Bodenhausen, G. *Chem Phys Lett* **1990**, *165*, 469.
- (3) Yang, D.; Kay, L. E. *J Biomol NMR* **1999**, *13*, 3.
- (4) Kupce, E.; Freeman, R. *J Magn Reson Ser A* **1995**, *115*, 273.
- (5) Frueh, D. P.; Vosburg, D. A.; Walsh, C. T.; Wagner, G. *J Biomol NMR* **2006**, *34*, 31.
